# Supplementary material for: The room temperature synthesis of a CuO-Bi-BiOBr ternary Z-scheme photocatalyst for enhanced sunlight driven alcohol oxidation
Source: Royal Society of Chemistry journal article supplement (doi:10.1039/d1dt00158b), 2021-01-01
Supplement: d1dt00158b1.pdf [file d1dt00158b1.pdf]

**Electronic Supplementary Information (ESI)**

**Room temperature synthesis of CuO-Bi-BiOBr ternary Z-scheme photocatalyst for enhanced sunlight driven alcohol oxidation**

**Narendra Singh Bisht,<sup>†</sup> S.P.S. Mehta,<sup>†</sup> Nanda Gopal Sahoo,<sup>†</sup> Anirban Dandapat<sup>†\*</sup>**

<sup>†</sup>*Department of Chemistry, D.S.B Campus, Kumaun University, Nainital, Uttarakhand*

*\*Corresponding author email: [dranirbandandapat@kumainital.ac.in](mailto:dranirbandandapat@kumainital.ac.in)*

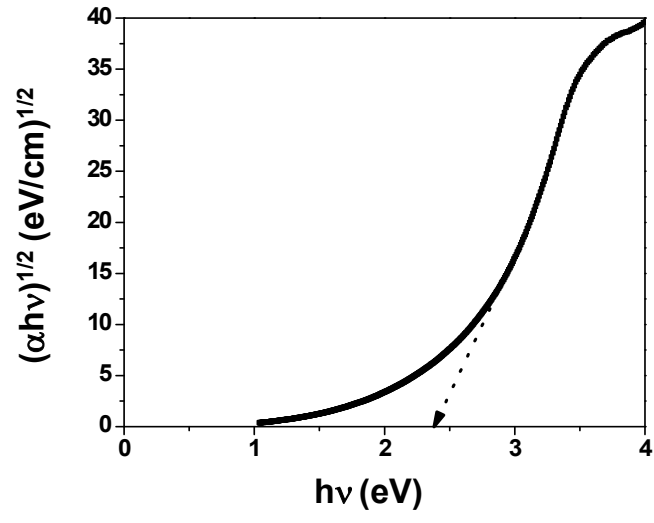

**Fig. S1:** Tauc plots of  $(\alpha h\nu)^{1/2}$  vs  $h\nu$  for determining the band gaps of CuO-Bi-BiOBr

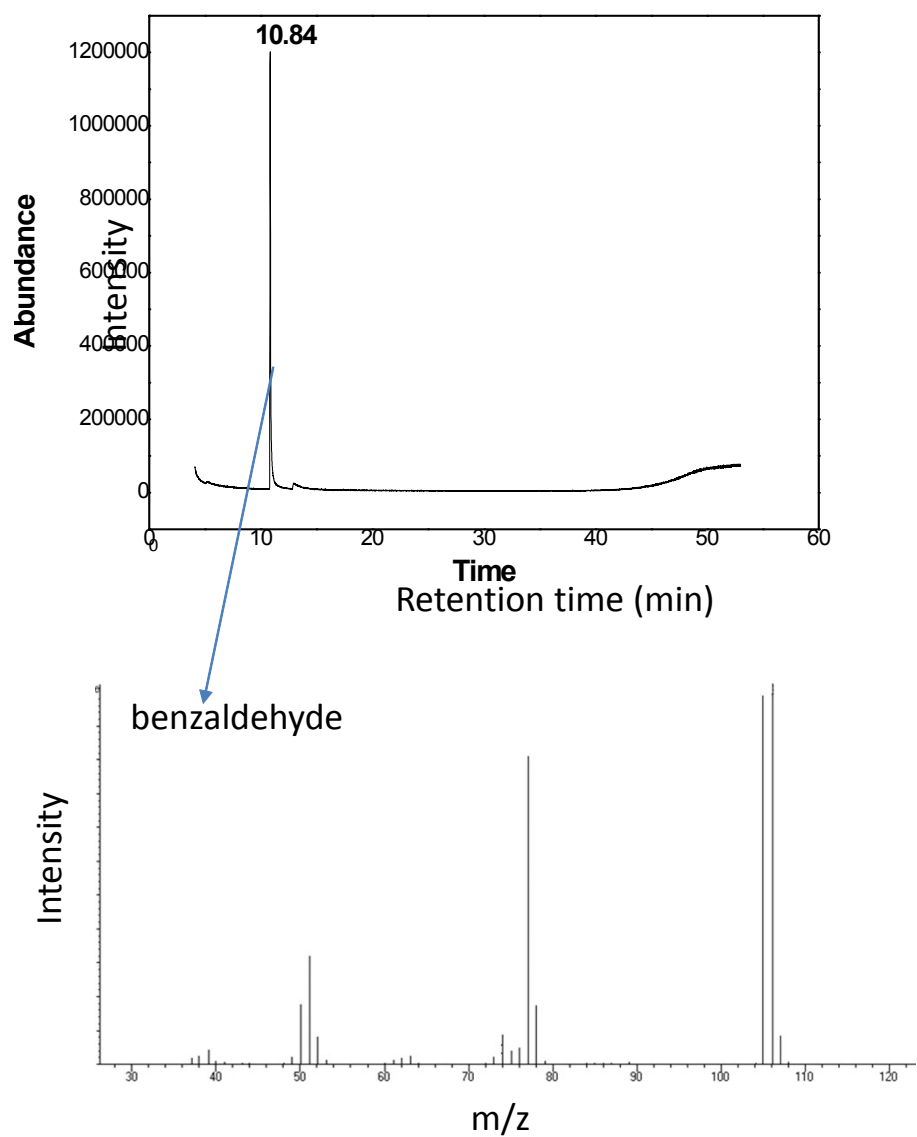

**Fig. S2** GC-MS analysis of the products after the completion of the reaction.

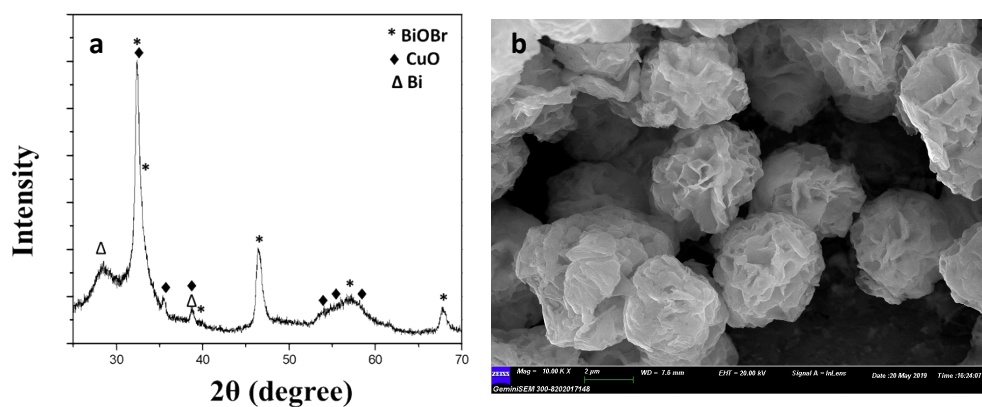

**Fig. S3** (a) XRD pattern and (b) FESEM images of the CuO-Bi-BiOBr samples after 6<sup>th</sup> cycle of the catalytic reaction.
